# Supplementary material
Source: MDPI journal article supplement (https://www.mdpi.com/2073-4441/11/9/1947)
Supplement: s1 [file s1]

# **Supplementary Material: Climate Change Made Major Contributions to Soil Water Storage Decline in the Southwestern US during 2003–2014**

**Jianzhao Liu<sup>1</sup>, Liping Gao<sup>2</sup>, Fenghui Yuan<sup>1,3,4</sup>, Yuedong Guo<sup>1</sup>, Xiaofeng Xu<sup>1,4</sup>**

1. Northeast Institute of Geography and Agroecology, Chinese Academy of Sciences, Changchun 130102, China

2. College of Global Talent, Beijing Institute of Technology, Zhuhai 519088, China

3. Key Laboratory of Forest Ecology and Management, Institute of Applied Ecology, Chinese Academy of Sciences, Shenyang 110016, China

4. Biology Department, San Diego State University, San Diego, CA 92182, USA

Corresponding Author: (X.X) xxu@sdsu.edu

This file contains Figure S1–S4, and Table S1–S2.

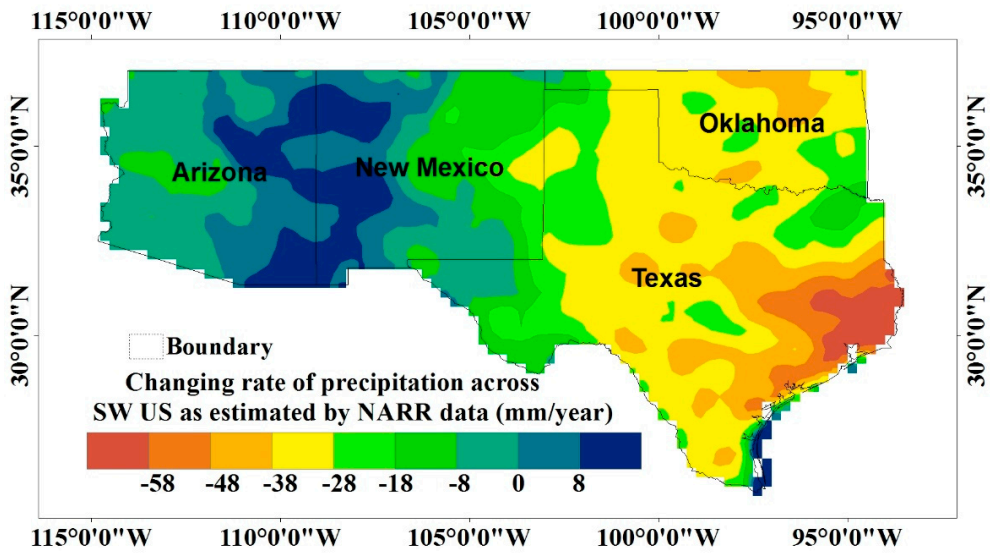

Figure 1. Changing rate of annual precipitation from 2003 to 2014.

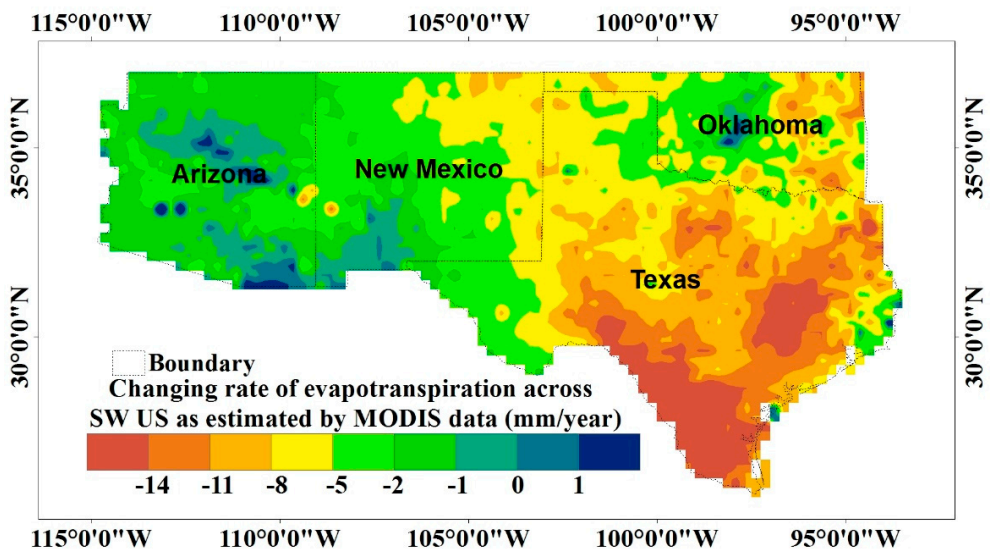

Figure S2. Changing rate of evapotranspiration during 2003–2014.

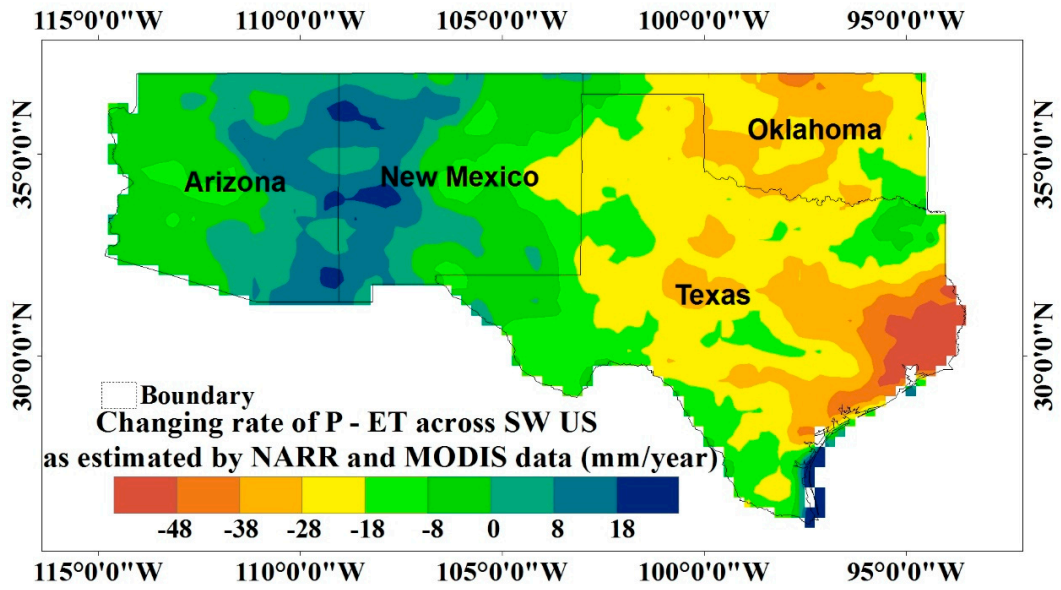

Figure S3. Changing rate of net atmospheric water input (precipitation–evapotranspiration) from 2003 to 2014.

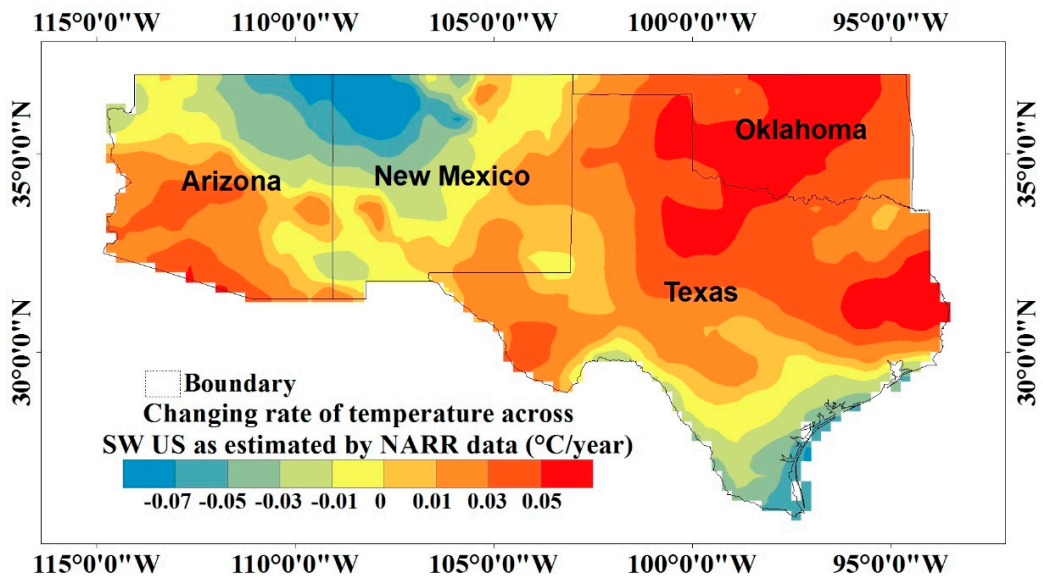

Figure S4. Changing rate of air temperature from 2003 to 2014.

**Table S1.** Average water consumption (mm/m<sup>2</sup>/year) for each state and entire SWUS region during 2003–2010.

| Year | SWUS  | AZ    | NM    | OK    | TX    |
|------|-------|-------|-------|-------|-------|
| 2003 | 35.31 | 28.19 | 15.18 | 13.68 | 53.32 |
| 2004 | 34.72 | 27.72 | 15.23 | 13.20 | 52.57 |
| 2005 | 34.13 | 27.25 | 15.28 | 12.72 | 51.81 |
| 2006 | 34.16 | 27.12 | 15.13 | 15.26 | 51.36 |
| 2007 | 34.20 | 27.00 | 14.99 | 17.80 | 50.90 |
| 2008 | 34.23 | 26.88 | 14.84 | 20.34 | 50.44 |
| 2009 | 34.27 | 26.76 | 14.69 | 22.88 | 49.98 |
| 2010 | 34.30 | 26.63 | 14.54 | 25.43 | 49.52 |
| 2011 | 34.28 | 26.70 | 14.61 | 24.16 | 49.75 |
| 2012 | 34.28 | 26.70 | 14.61 | 24.16 | 49.75 |
| 2013 | 34.28 | 26.70 | 14.61 | 24.16 | 49.75 |
| 2014 | 34.28 | 26.70 | 14.61 | 24.16 | 49.75 |

Note: SW stands for Southwest US. AZ, NM, OK, and TX stand for Arizona, New Mexico, Oklahoma, and Texas, respectively.

**Table S2.** Annual temperature (°C) at state and regional level in SWUS during 2003–2014.

| Year | SWUS  | AZ    | NM    | OK    | TX    |
|------|-------|-------|-------|-------|-------|
| 2003 | 17.21 | 13.92 | 13.92 | 15.88 | 19.31 |
| 2004 | 16.73 | 12.90 | 12.90 | 16.06 | 19.11 |
| 2005 | 17.27 | 13.59 | 13.59 | 16.49 | 19.62 |
| 2006 | 17.65 | 13.62 | 13.62 | 17.26 | 20.22 |
| 2007 | 16.67 | 13.15 | 13.15 | 15.54 | 18.73 |
| 2008 | 16.52 | 12.50 | 12.50 | 15.33 | 19.09 |
| 2009 | 16.42 | 12.83 | 12.83 | 15.00 | 18.77 |
| 2010 | 16.64 | 12.91 | 12.91 | 16.18 | 18.91 |
| 2011 | 17.42 | 13.11 | 13.11 | 17.30 | 20.30 |
| 2012 | 18.21 | 14.24 | 14.24 | 18.11 | 20.63 |
| 2013 | 16.69 | 12.82 | 12.82 | 15.88 | 19.15 |
| 2014 | 17.05 | 13.42 | 13.42 | 16.07 | 19.10 |

Note: SW stands for Southwest US. AZ, NM, OK, and TX stand for Arizona, New Mexico, Oklahoma, and Texas, respectively.
